# Supplementary material for: Anodic behaviour of methylidene-cyclopentadiaryl derivatives: cyclic voltammetry and theoretical study
Source: Royal Society of Chemistry journal article supplement (doi:10.1039/b704340f), 2007-01-01
Supplement: b704340f.pdf [file b704340f.pdf]

## **Anodic behaviour of methylenecyclopentadienyl derivatives: Cyclic voltammetry and theoretical study†**

**Cécile Hubert,<sup>a</sup> Khoa Tran,<sup>a</sup> Fanny Hauquier,<sup>a</sup> Charles Cougnon,<sup>a</sup> Jean-François Pilard,<sup>\*a</sup> Pascal Gosselin,<sup>\*a</sup> Joëlle Rault-Berthelot<sup>b</sup> and Eugène Raoult<sup>b</sup>**

<sup>a</sup> *Unité de Chimie Organique Moléculaire et Macromoléculaire (UCO2M, UMR CNRS 6011), Université du Maine, Avenue O. Messiaen, F-72085 Le Mans, France. Fax: +33 2438 33754; Tel: +33 2438 33540; E-mail: [jean-francois.pilard@univ-lemans.fr](mailto:jean-francois.pilard@univ-lemans.fr), [pascal.gosselin@univ-lemans.fr](mailto:pascal.gosselin@univ-lemans.fr)*

<sup>b</sup> *Laboratoire d'Electrochimie Moléculaire & Macromoléculaire (UMR CNRS 6510), Institut de Chimie de Rennes, Université de Rennes I, 263 Avenue du Général Leclerc F-35042 Rennes, France.*

### **Electronic Supplementary Information**

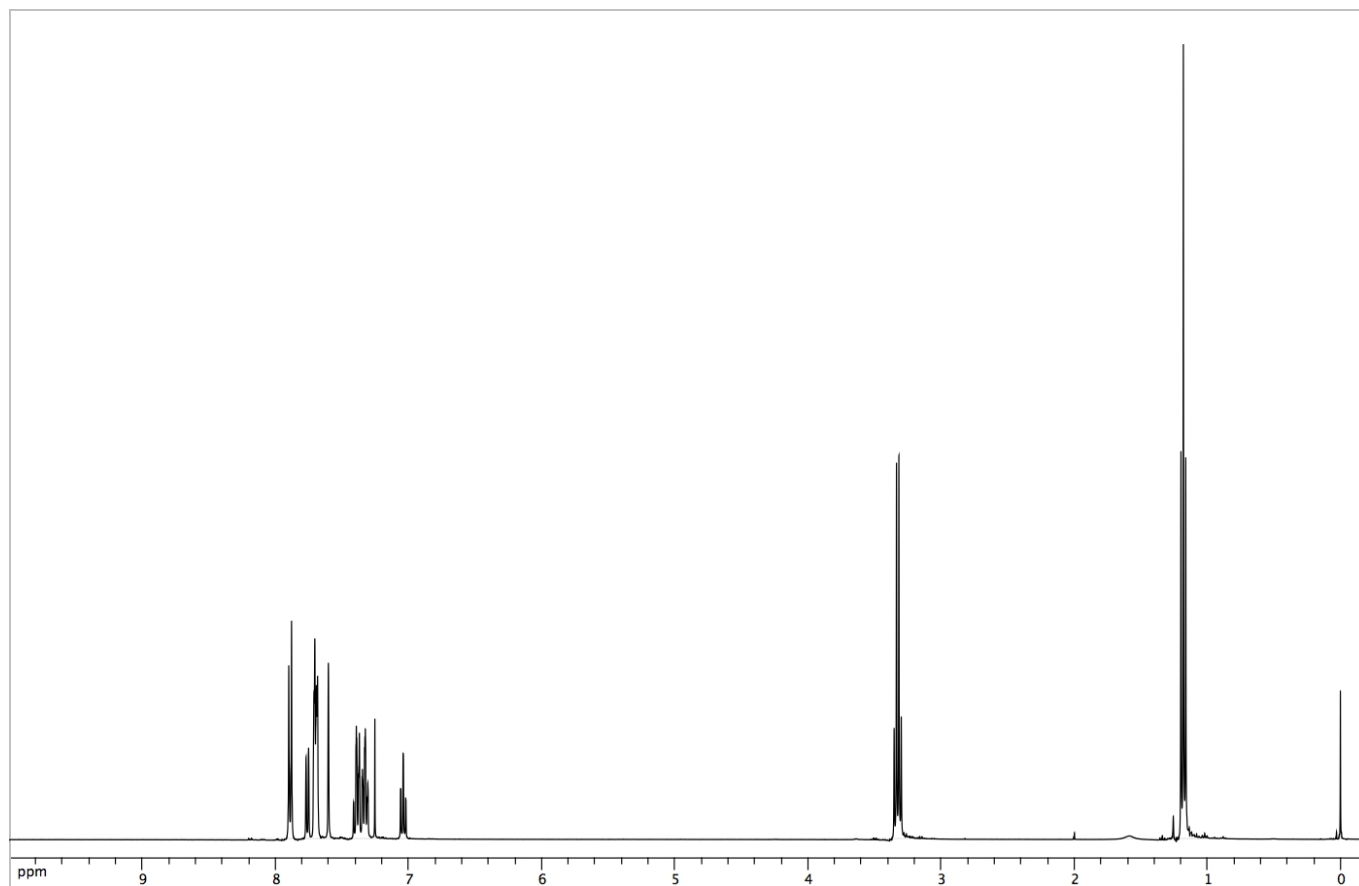

**Figure S1.** The 400 MHz <sup>1</sup>H NMR spectrum of **1**.

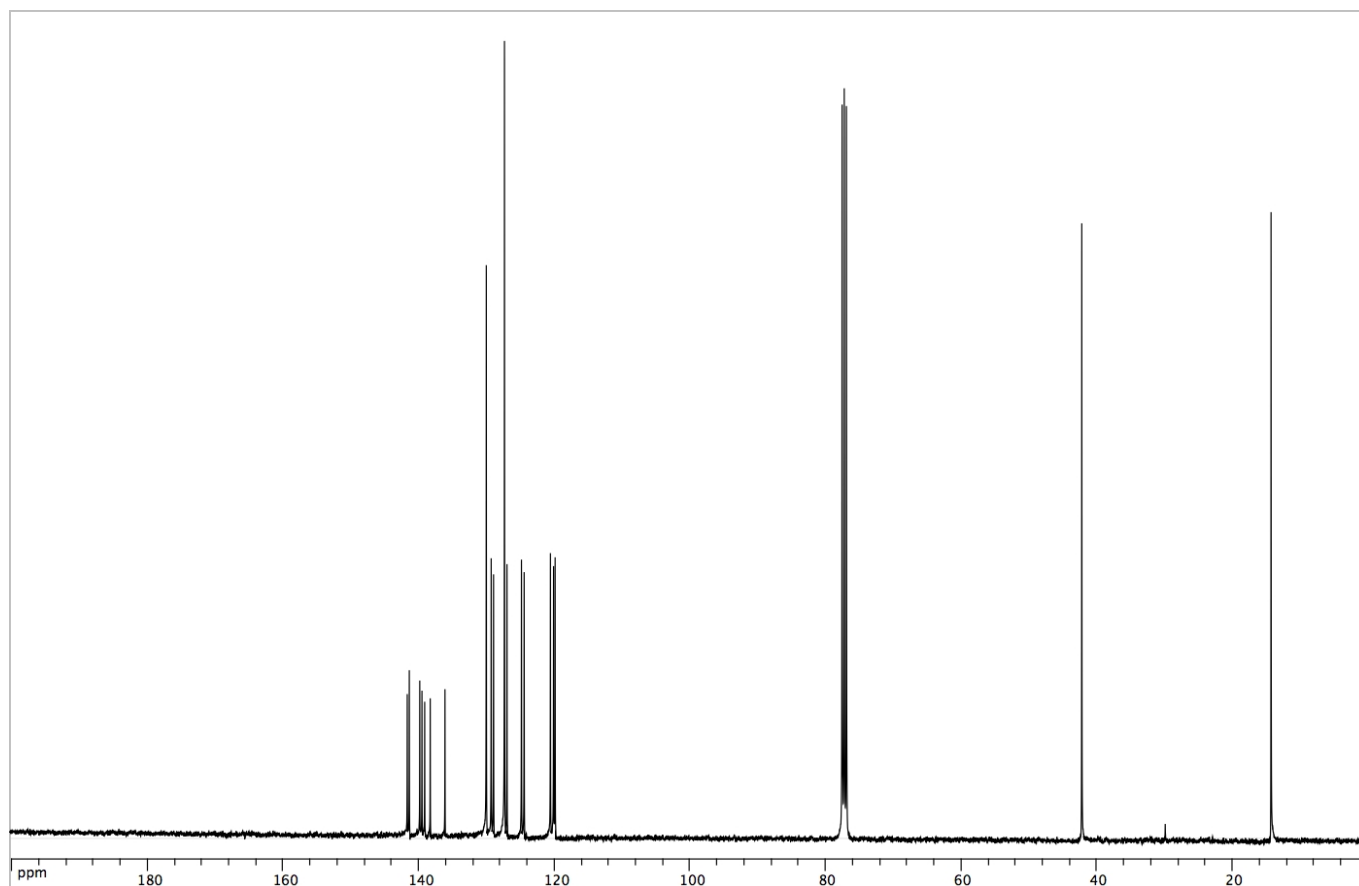

**Figure S2.** The 100 MHz  $^{13}\text{C}$  NMR spectrum of **1**.

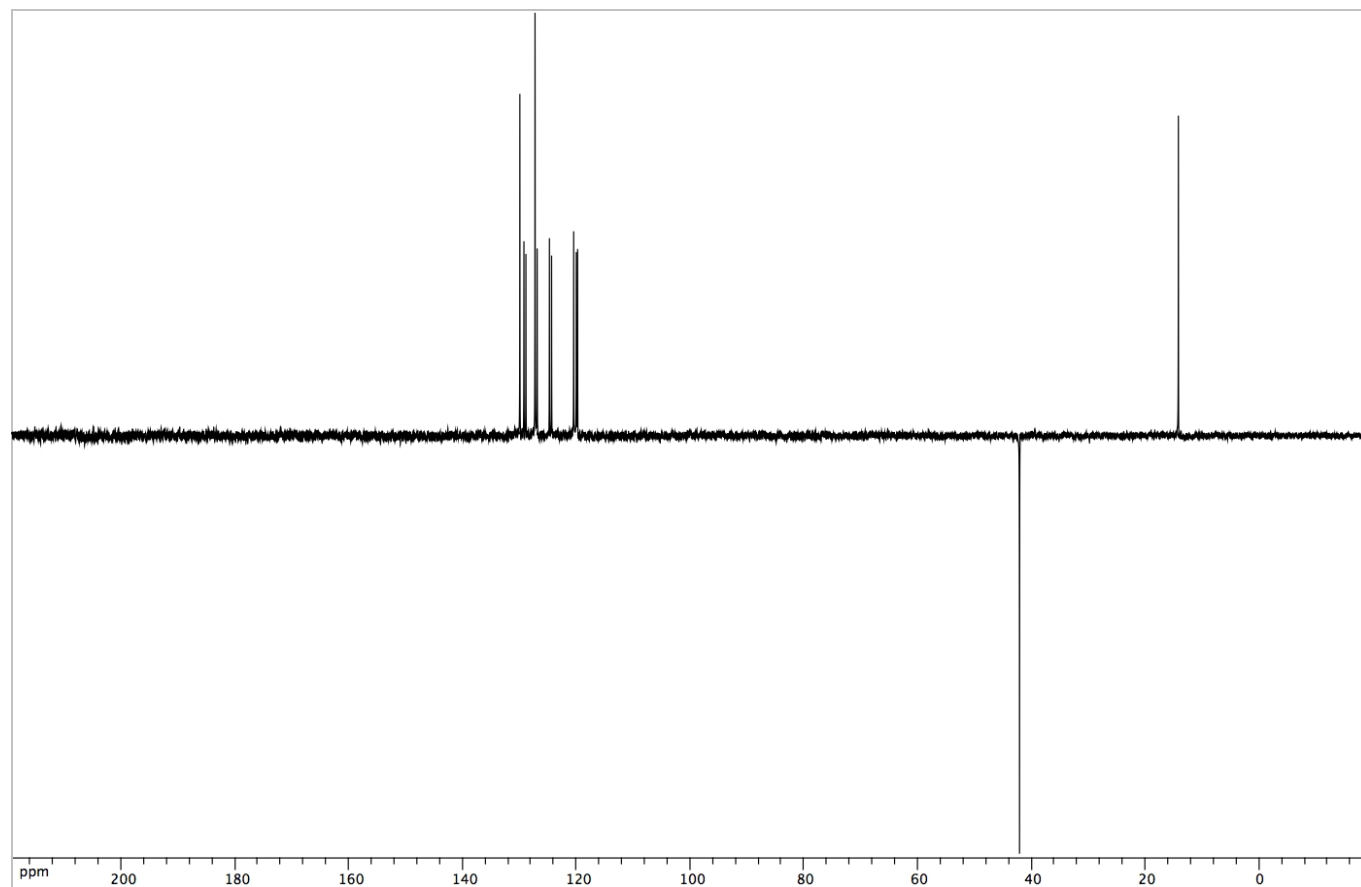

**Figure S3.** The 100 MHz  $^{13}\text{C}$  DEPT spectrum of **1**.

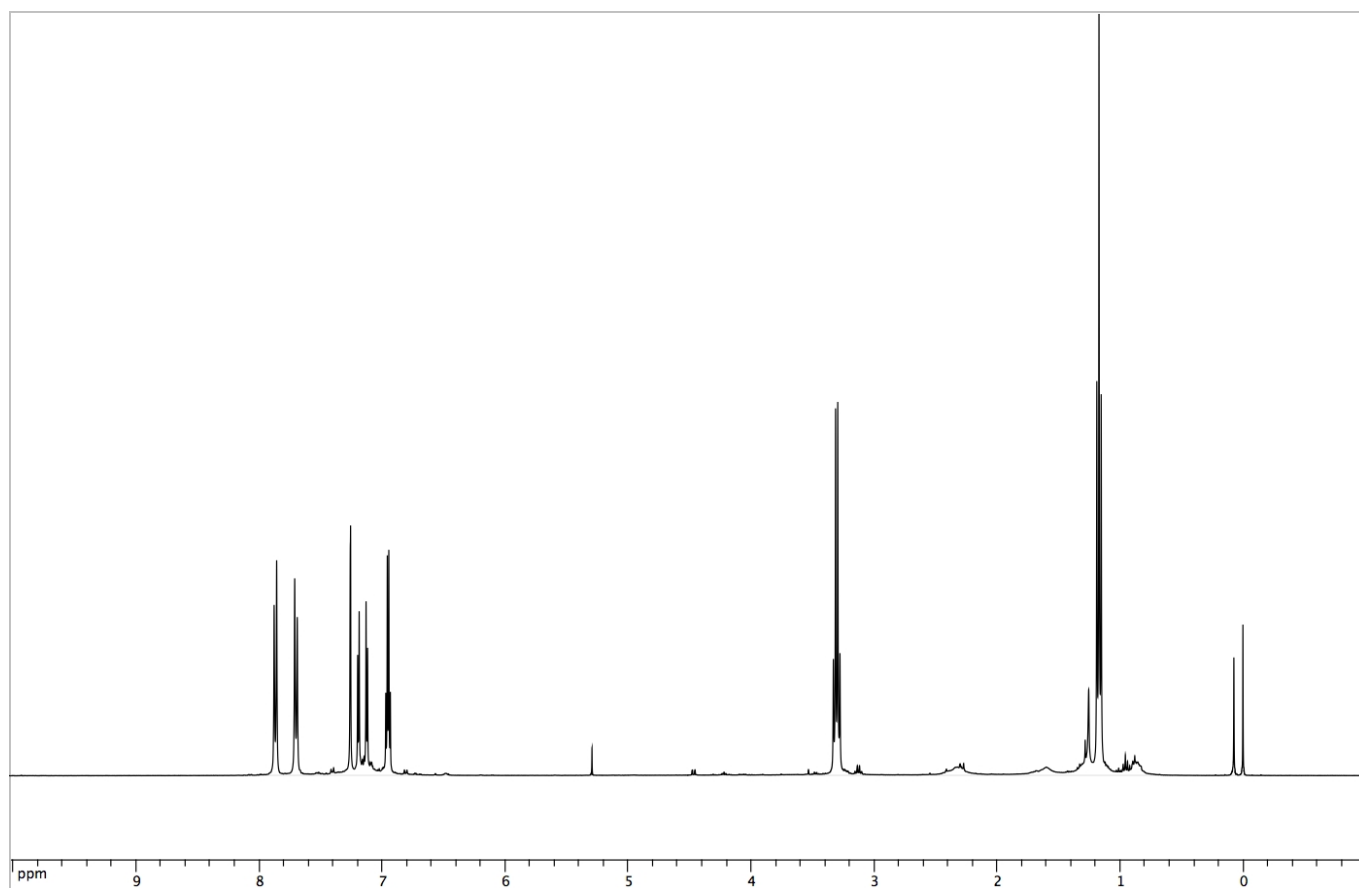

**Figure S4.** The 400 MHz  $^1\text{H}$  NMR spectrum of **2**.

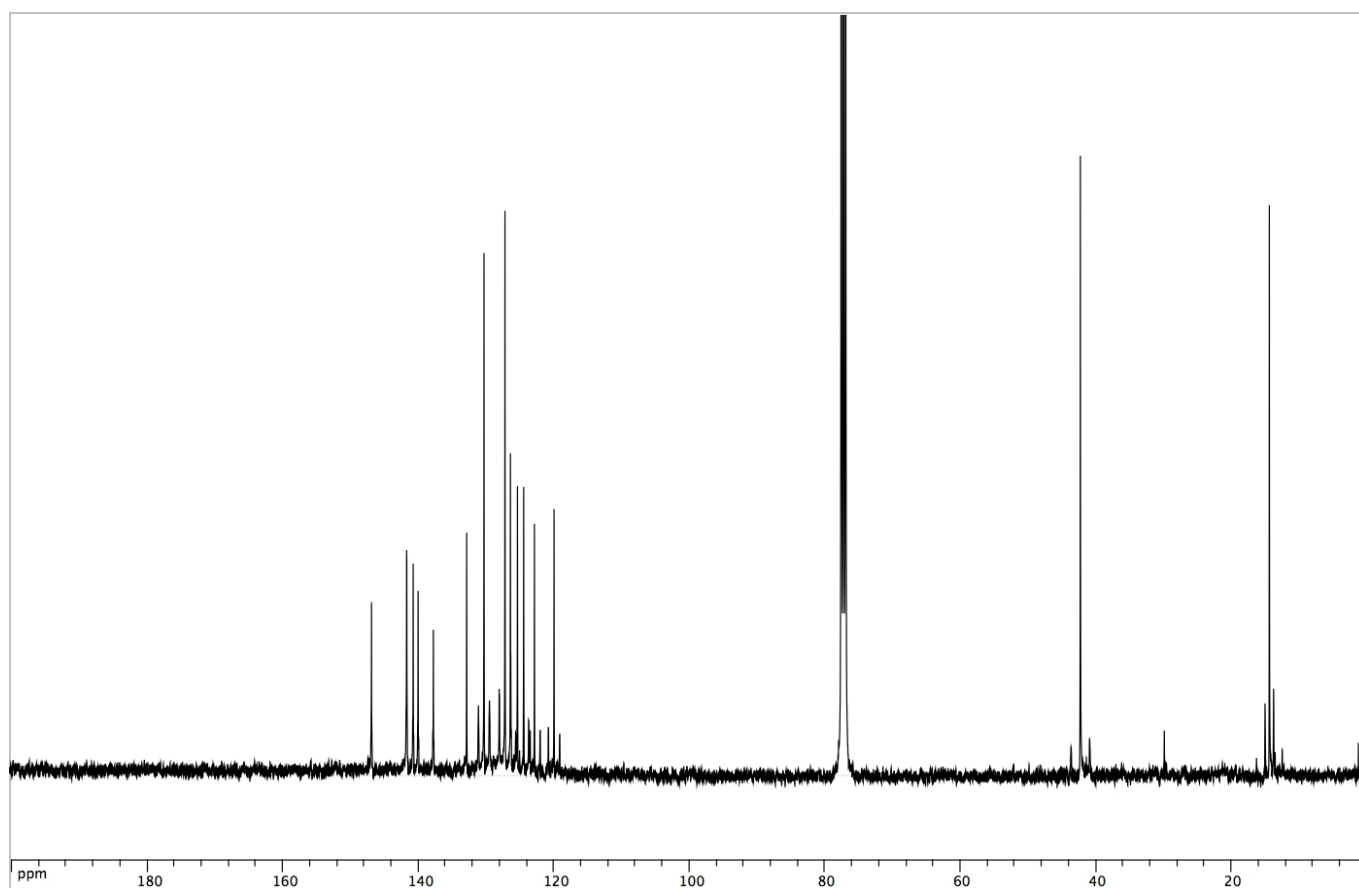

**Figure S5.** The 100 MHz  $^{13}\text{C}$  NMR spectrum of **2**.

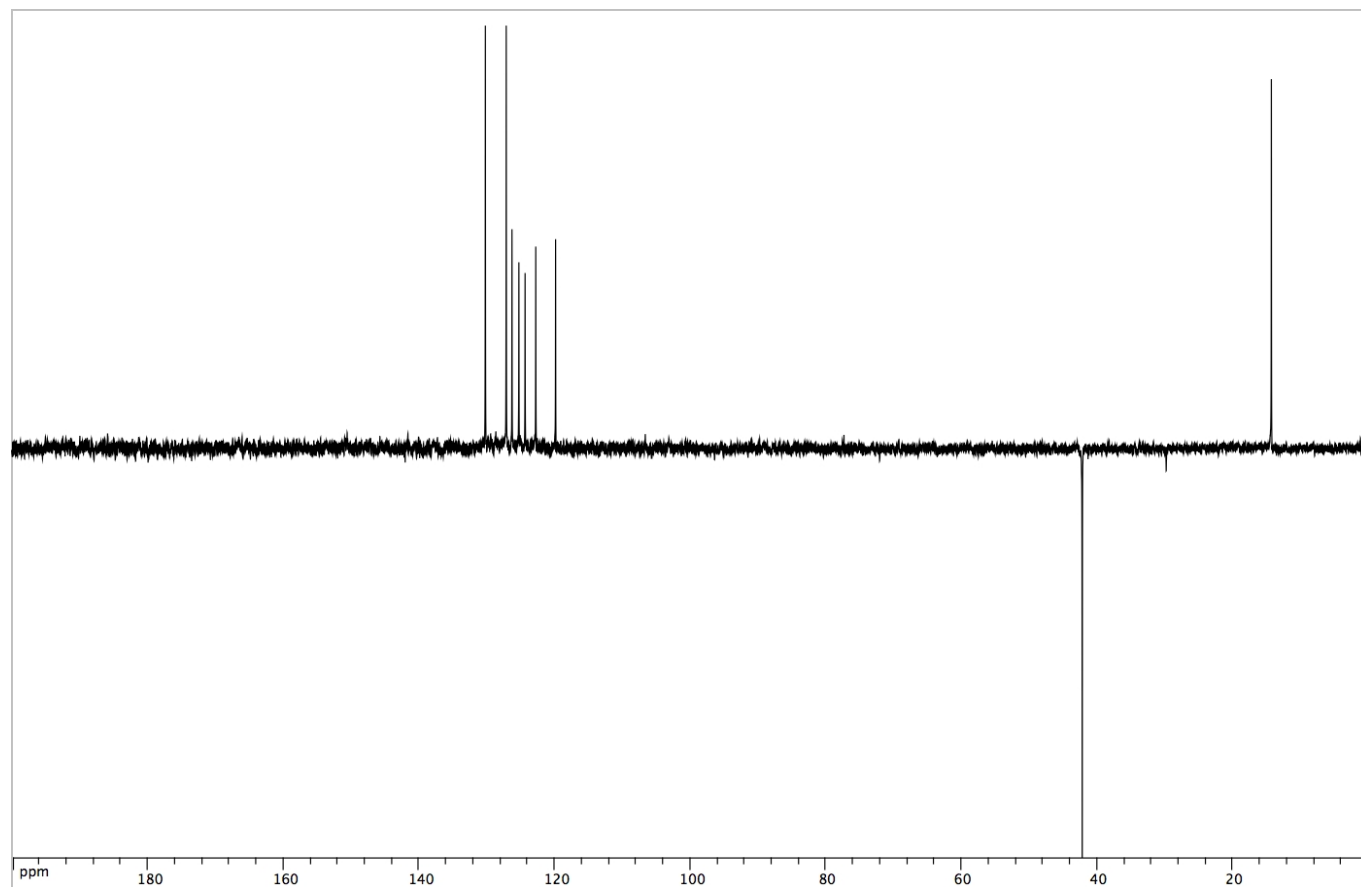

**Figure S6.** The 100 MHz  $^{13}\text{C}$  DEPT spectrum of **2**.

**1' neutral rb3lyp/6-31g(d) Energy = -1.453106540464423E+03 au**

|   |             |             |             |
|---|-------------|-------------|-------------|
| C | -4.72514282 | -0.21930961 | 0.11437942  |
| C | -3.71100262 | -1.19086714 | -0.03790421 |
| C | -2.39416315 | -0.51116543 | -0.13377514 |
| C | -2.69586298 | 0.94328154  | -0.08193395 |
| C | -4.09691719 | 1.10632500  | 0.07525864  |
| C | -1.23046076 | -1.19261859 | -0.27045392 |
| C | 0.16347620  | -0.72886616 | -0.23607069 |
| H | -1.32496860 | -2.26736736 | -0.42597825 |
| C | 2.86631649  | 0.00393015  | -0.15213180 |
| C | 1.10146463  | -1.31516752 | -1.11112989 |
| C | 0.62537795  | 0.21218416  | 0.70132294  |
| C | 1.96787615  | 0.58353166  | 0.74387348  |
| C | 2.44023055  | -0.94522620 | -1.08586123 |
| H | 0.76451098  | -2.05879781 | -1.82856657 |
| H | -0.07096663 | 0.63885100  | 1.41562041  |
| H | 2.32578711  | 1.31040481  | 1.46525627  |
| H | 3.15150340  | -1.38707016 | -1.77561801 |
| S | 4.58122734  | 0.53210872  | -0.14557803 |
| O | 4.98784416  | 0.84285705  | -1.52003190 |
| O | 4.72906060  | 1.53848898  | 0.91701460  |
| N | 5.37462127  | -0.92199747 | 0.26359875  |
| C | 6.75385695  | -1.01372658 | -0.23808023 |
| C | 5.23800471  | -1.28671695 | 1.67846944  |

|   |             |             |             |
|---|-------------|-------------|-------------|
| H | 6.77836230  | -0.71838646 | -1.28684125 |
| H | 7.06682513  | -2.05912040 | -0.15300588 |
| H | 4.18538725  | -1.25454789 | 1.97111848  |
| H | 5.81272606  | -0.62757871 | 2.34353588  |
| C | -6.05862605 | -0.59838288 | 0.25607211  |
| C | -4.03696049 | -2.54619774 | -0.04418342 |
| C | -1.88914984 | 2.07322411  | -0.23762342 |
| C | -4.67025209 | 2.37474368  | 0.12683619  |
| H | -3.26976234 | -3.30896015 | -0.15129107 |
| C | -6.37815608 | -1.95876996 | 0.24069719  |
| H | -6.84051364 | 0.14707429  | 0.37596535  |
| H | -7.41367615 | -2.27016431 | 0.34794138  |
| C | -5.37591009 | -2.92412299 | 0.09047806  |
| H | -5.63996683 | -3.97802821 | 0.08103316  |
| C | -2.47053906 | 3.34389436  | -0.19303322 |
| H | -0.82224993 | 1.98232603  | -0.40356212 |
| C | -3.84703027 | 3.49612655  | -0.00024142 |
| H | -5.74359752 | 2.49330114  | 0.25058571  |
| H | -4.28083827 | 4.49171461  | 0.03756411  |
| H | -1.84168374 | 4.22175906  | -0.31241738 |
| H | 7.45548338  | -0.38684571 | 0.33207426  |
| H | 5.59183250  | -2.31570988 | 1.79499149  |

**1' radical-cation ub3lyp/6-31g(d) Energy = -1.452845681334502E+03 au**

|   |             |             |             |
|---|-------------|-------------|-------------|
| C | -4.65907171 | -0.25372882 | 0.27667831  |
| C | -3.63791698 | -1.18428169 | -0.05710162 |
| C | -2.39975319 | -0.45434247 | -0.30599821 |
| C | -2.71431336 | 0.97296247  | -0.19714240 |
| C | -4.08461894 | 1.09884345  | 0.16835960  |
| C | -1.20482411 | -1.11047066 | -0.62086136 |
| C | 0.15605790  | -0.69045906 | -0.52055976 |
| H | -1.32947529 | -2.12852804 | -0.98716825 |
| C | 2.87303058  | -0.01902632 | -0.36153668 |
| C | 1.13545252  | -1.41705357 | -1.25812649 |
| C | 0.59834813  | 0.35598244  | 0.33816988  |
| C | 1.93911671  | 0.68494503  | 0.41637221  |
| C | 2.47161366  | -1.06994609 | -1.20314593 |
| H | 0.81495913  | -2.22924395 | -1.90454181 |
| H | -0.11772566 | 0.87466733  | 0.96452537  |
| H | 2.27653765  | 1.49141641  | 1.05823443  |
| H | 3.20597111  | -1.58384928 | -1.81367006 |
| S | 4.61667315  | 0.44174409  | -0.28575396 |
| O | 5.18919546  | 0.07347763  | -1.57799482 |
| O | 4.65005513  | 1.80103141  | 0.24937074  |
| N | 5.22395273  | -0.60380932 | 0.87257518  |
| C | 6.07228454  | -1.72830320 | 0.46190773  |
| C | 5.41270087  | -0.12107456 | 2.24485056  |
| H | 5.87299787  | -1.99449288 | -0.57506492 |
| H | 5.85583607  | -2.58433704 | 1.10900230  |

## Supplementary Material (ESI) for New Journal of Chemistry

This journal is (c) The Royal Society of Chemistry and

The Centre National de la Recherche Scientifique, 2007

|   |             |             |             |
|---|-------------|-------------|-------------|
| H | 4.72163350  | 0.69253408  | 2.46174130  |
| H | 6.43670764  | 0.24364287  | 2.39497168  |
| C | -5.92725256 | -0.69466060 | 0.60846459  |
| C | -3.89653345 | -2.56216776 | -0.04813352 |
| C | -1.96532691 | 2.11802988  | -0.50078929 |
| C | -4.66690632 | 2.34590112  | 0.30671694  |
| H | -3.12380361 | -3.28591722 | -0.29055065 |
| C | -6.18180100 | -2.08095706 | 0.60276944  |
| H | -6.71895432 | 0.00121198  | 0.86922911  |
| H | -7.17474961 | -2.43847173 | 0.85829671  |
| C | -5.18110163 | -3.00222761 | 0.27713607  |
| H | -5.40375836 | -4.06413811 | 0.27978719  |
| C | -2.55971376 | 3.37776777  | -0.36291915 |
| H | -0.94570314 | 2.04619250  | -0.86181712 |
| C | -3.88731062 | 3.49177777  | 0.04931500  |
| H | -5.70906929 | 2.45181219  | 0.59284900  |
| H | -4.33638061 | 4.47493948  | 0.15249820  |
| H | -1.98498465 | 4.26943154  | -0.59118554 |
| H | 7.13446176  | -1.46850005 | 0.55598051  |
| H | 5.22409330  | -0.95074535 | 2.93335687  |

**2' neutral rb3lyp/6-31g(d) Energy = -2.094598964840660E+03 au**

|   |             |             |             |
|---|-------------|-------------|-------------|
| S | -6.10632418 | -0.82965269 | 0.37035396  |
| C | -4.50629883 | -0.21999219 | 0.15573031  |
| C | -3.56837271 | -1.23654588 | 0.04061427  |
| C | -4.14825277 | -2.53265882 | 0.13229153  |
| C | -5.50686420 | -2.47472755 | 0.30498472  |
| C | -2.22043562 | -0.64054918 | -0.10434959 |
| H | -3.60293940 | -3.46856009 | 0.07158013  |
| H | -6.20541151 | -3.29536748 | 0.39556565  |
| S | -4.23199191 | 2.72056713  | 0.00255421  |
| C | -2.55310747 | 3.14025114  | -0.26008440 |
| C | -1.73567754 | 2.04168843  | -0.29443466 |
| C | -2.45437812 | 0.82508475  | -0.09443670 |
| C | -3.82208286 | 1.04771641  | 0.06509176  |
| H | -2.27681531 | 4.18027939  | -0.36711419 |
| H | -0.66938586 | 2.11683128  | -0.46626196 |
| C | -1.09413706 | -1.38208709 | -0.24500036 |
| C | 0.30801757  | -0.95690016 | -0.28775473 |
| H | -1.23962752 | -2.45689728 | -0.35187123 |
| C | 3.01663031  | -0.25258664 | -0.37599659 |
| C | 1.21445999  | -1.67202661 | -1.09236685 |
| C | 0.80372661  | 0.10200326  | 0.50005261  |
| C | 2.14600837  | 0.45933091  | 0.45450711  |
| C | 2.55977954  | -1.31779792 | -1.15238801 |
| H | 0.85267834  | -2.50414769 | -1.69068236 |
| H | 0.13176337  | 0.62425899  | 1.17228623  |
| H | 2.52253399  | 1.27339686  | 1.06496453  |
| H | 3.25500388  | -1.85188743 | -1.79112354 |

## Supplementary Material (ESI) for New Journal of Chemistry

This journal is (c) The Royal Society of Chemistry and

The Centre National de la Recherche Scientifique, 2007

|   |            |             |             |
|---|------------|-------------|-------------|
| S | 4.73579210 | 0.24977658  | -0.49315861 |
| O | 5.39048558 | -0.64321178 | -1.46128248 |
| O | 4.79135448 | 1.70430566  | -0.67208415 |
| N | 5.27859079 | -0.05134871 | 1.09554710  |
| C | 5.46954821 | -1.47582933 | 1.39245513  |
| C | 6.40683997 | 0.79419858  | 1.51392487  |
| H | 4.57404824 | -2.03754147 | 1.11449998  |
| H | 5.61138962 | -1.57657113 | 2.47284697  |
| H | 6.49462365 | 0.71223778  | 2.60182290  |
| H | 6.20004544 | 1.83113809  | 1.25005611  |
| H | 7.35924641 | 0.48621738  | 1.05761242  |
| H | 6.33595398 | -1.90518627 | 0.87088641  |

**2' radical-cation ub3lyp/6-31g(d) Energy = -2.094351714764352E+03 au**

|   |             |             |             |
|---|-------------|-------------|-------------|
| S | -6.13755194 | -0.80111257 | 0.33289792  |
| C | -4.51996626 | -0.19557696 | 0.16065429  |
| C | -3.54584708 | -1.24764500 | 0.07584673  |
| C | -4.13335017 | -2.51712166 | 0.15534733  |
| C | -5.51099512 | -2.43090473 | 0.29196913  |
| C | -2.20563657 | -0.66835129 | -0.05747278 |
| H | -3.60937982 | -3.46501737 | 0.11980623  |
| H | -6.20610685 | -3.25797886 | 0.37557595  |
| S | -4.26701546 | 2.70852001  | -0.03007096 |
| C | -2.58351859 | 3.08294714  | -0.27985106 |
| C | -1.74038295 | 1.97961700  | -0.28718714 |
| C | -2.44432614 | 0.78495298  | -0.08111748 |
| C | -3.85956738 | 1.02414495  | 0.05719011  |
| H | -2.29200537 | 4.11781465  | -0.41481356 |
| H | -0.67395493 | 2.06746614  | -0.44755187 |
| C | -1.06893623 | -1.41160293 | -0.19903603 |
| C | 0.32291071  | -0.99380814 | -0.22123243 |
| H | -1.22380408 | -2.48222047 | -0.33176708 |
| C | 3.01593434  | -0.26682588 | -0.33759879 |
| C | 1.23184313  | -1.73253234 | -1.00524103 |
| C | 0.80684142  | 0.08985168  | 0.54545706  |
| C | 2.14568130  | 0.45045715  | 0.49093000  |
| C | 2.56954580  | -1.35516059 | -1.08690959 |
| H | 0.87819465  | -2.58502132 | -1.57882553 |
| H | 0.13894498  | 0.61153642  | 1.22304077  |
| H | 2.52232116  | 1.27671578  | 1.08441630  |
| H | 3.26626788  | -1.88793702 | -1.72525167 |
| S | 4.73154464  | 0.28467575  | -0.50003761 |
| O | 5.33544671  | -0.54819111 | -1.54521729 |



|   |            |             |             |
|---|------------|-------------|-------------|
| O | 4.69563164 | 1.74433672  | -0.61113344 |
| N | 5.34294658 | -0.08103763 | 1.03335743  |
| C | 5.70306879 | -1.49520211 | 1.21794304  |
| C | 6.34781660 | 0.86758296  | 1.54910252  |
| H | 4.87831195 | -2.13861894 | 0.90085462  |
| H | 5.86829883 | -1.65765596 | 2.28654515  |
| H | 6.43282580 | 0.69844096  | 2.62628551  |
| H | 6.01200305 | 1.88883863  | 1.37262107  |
| H | 7.33361381 | 0.72478403  | 1.08634562  |
| H | 6.60688696 | -1.77531257 | 0.66262928  |

**3 neutral rb3lyp/6-31g(d) Energy = -7.239930305131547E+02 au**

|   |             |             |             |
|---|-------------|-------------|-------------|
| C | -0.73462841 | -1.51033581 | -0.00003499 |
| C | -1.18536293 | -0.16661933 | 0.00006019  |
| C | -0.00003265 | 0.71946603  | 0.00000673  |
| C | 1.18538645  | -0.16644488 | 0.00001531  |
| C | 0.73484607  | -1.51022520 | -0.00000402 |
| C | -0.00017877 | 2.09414000  | -0.00001122 |
| C | -1.63700399 | -2.56534432 | -0.00015562 |
| C | -2.55460825 | 0.10980645  | 0.00007996  |
| C | 2.55460312  | 0.11018879  | 0.00008575  |
| C | 1.63739796  | -2.56509147 | 0.00006160  |
| H | -2.92990815 | 1.12527262  | 0.00017344  |
| C | -3.00827002 | -2.27944762 | -0.00016804 |
| H | -1.29108055 | -3.59527986 | -0.00022731 |
| H | -3.72650056 | -3.09462136 | -0.00026158 |
| C | -3.45925711 | -0.95829505 | -0.00005031 |
| H | -4.52509215 | -0.75077737 | -0.00005872 |
| C | 3.45940907  | -0.95776419 | 0.00013704  |
| H | 2.92979473  | 1.12569945  | 0.00004840  |
| C | 3.00861244  | -2.27899416 | 0.00012800  |
| H | 1.29164241  | -3.59508544 | 0.00004362  |
| H | 3.72696133  | -3.09406300 | 0.00018299  |
| H | 4.52521734  | -0.75011082 | 0.00018274  |
| C | 1.19613018  | 2.87915395  | -0.00024180 |
| N | 2.15113442  | 3.54512435  | -0.00038860 |
| C | -1.19663242 | 2.87893211  | 0.00007592  |
| N | -2.15163423 | 3.54490624  | 0.00038994  |

**3 radical-cation ub3lyp/6-31g(d) Energy = -7.236988734029403E+02 au**

|   |             |             |             |
|---|-------------|-------------|-------------|
| C | -0.70581001 | -1.50425505 | 0.00010270  |
| C | -1.17781837 | -0.13759973 | 0.00016343  |
| C | -0.00242601 | 0.75668649  | 0.00012694  |
| C | 1.17912527  | -0.12934963 | -0.00009146 |
| C | 0.71665129  | -1.49926911 | -0.00017120 |
| C | -0.00774477 | 2.12728759  | 0.00011783  |
| C | -1.60727291 | -2.59352896 | 0.00001293  |
| C | -2.54075432 | 0.11279827  | -0.00007980 |
| C | 2.54035089  | 0.13065144  | 0.00024101  |
| C | 1.62578971  | -2.58216892 | -0.00017492 |
| H | -2.94420651 | 1.11725186  | -0.00004793 |
| C | -2.96284651 | -2.32369986 | -0.00019831 |
| H | -1.24251777 | -3.61556190 | 0.00011207  |
| H | -3.68336766 | -3.13495134 | -0.00031980 |
| C | -3.42308450 | -0.98510130 | -0.00026161 |
| H | -4.49226933 | -0.79507055 | -0.00046882 |
| C | 3.43030073  | -0.96096697 | 0.00040975  |
| H | 2.93676027  | 1.13788963  | 0.00037247  |
| C | 2.97939574  | -2.30278953 | 0.00014717  |
| H | 1.26832498  | -3.60677333 | -0.00045430 |
| H | 3.70560109  | -3.10896282 | 0.00023552  |
| H | 4.49815445  | -0.76359821 | 0.00073365  |
| C | 1.19409412  | 2.90224922  | -0.00056259 |
| N | 2.17181936  | 3.53282358  | -0.00075458 |
| C | -1.21555342 | 2.89293702  | 0.00027346  |
| N | -2.19765665 | 3.51667511  | 0.00068391  |

**1' neutral rb3lyp/6-31g(d) Charges**

|   |    | <b>Charges</b> |         |         | <b>Charges (H-included)</b> |         |         |
|---|----|----------------|---------|---------|-----------------------------|---------|---------|
|   |    | ChelpG         | MKS     | NPA     | ChelpG                      | MKS     | NPA     |
| C | 1  | -0,0861        | -0,1240 | -0,2254 | 0,0057                      | -0,0022 | 0,0128  |
| C | 2  | -0,0754        | -0,1193 | -0,2348 | 0,0084                      | 0,0004  | 0,0033  |
| C | 3  | -0,1484        | -0,1922 | -0,2086 | -0,0347                     | -0,0537 | 0,0240  |
| C | 4  | 0,0226         | 0,1277  | -0,0355 | 0,0226                      | 0,1277  | -0,0355 |
| C | 5  | 0,0682         | 0,0006  | -0,0355 | 0,0682                      | 0,0006  | -0,0355 |
| C | 6  | -0,1573        | -0,1586 | -0,2140 | -0,0463                     | -0,0287 | 0,0228  |
| C | 7  | 0,0005         | -0,1311 | -0,0186 | 0,0005                      | -0,1311 | -0,0186 |
| C | 8  | 0,0833         | 0,1471  | -0,0514 | 0,0833                      | 0,1471  | -0,0514 |
| C | 9  | -0,0211        | 0,0383  | -0,0293 | -0,0211                     | 0,0383  | -0,0293 |
| C | 10 | -0,1069        | -0,1869 | -0,2168 | -0,0113                     | -0,0550 | 0,0201  |
| C | 11 | -0,1027        | -0,0979 | -0,2205 | -0,0080                     | 0,0203  | 0,0181  |
| C | 12 | -0,0894        | -0,1429 | -0,2363 | 0,0059                      | -0,0176 | 0,0039  |
| C | 13 | -0,1003        | -0,1736 | -0,2046 | -0,0376                     | -0,0411 | 0,0396  |
| C | 14 | -0,2047        | -0,1656 | -0,1758 | -0,1101                     | -0,0592 | 0,0580  |
| C | 15 | 0,2384         | 0,1636  | -0,0526 | 0,2384                      | 0,1636  | -0,0526 |
| C | 16 | -0,1530        | -0,1537 | -0,2197 | -0,0731                     | -0,0346 | 0,0346  |
| C | 17 | 0,0091         | -0,0535 | -0,2127 | 0,1086                      | 0,0668  | 0,0580  |
| C | 18 | -0,0600        | -0,0212 | -0,3338 | -0,0600                     | -0,0212 | -0,3338 |
| C | 19 | -0,0564        | -0,1508 | -0,1988 | 0,0500                      | -0,0081 | 0,0632  |
| C | 20 | -0,2061        | -0,1489 | -0,2081 | -0,0794                     | -0,0141 | 0,0362  |
| S | 21 | 0,8666         | 0,7871  | 2,3430  | 0,8666                      | 0,7871  | 2,3430  |
| N | 22 | -0,3399        | -0,2165 | -0,7271 | -0,3399                     | -0,2165 | -0,7271 |
| C | 23 | -0,0653        | -0,2948 | -0,4840 | 0,1713                      | 0,1203  | 0,2240  |
| C | 24 | -0,0442        | -0,3006 | -0,4849 | 0,1373                      | 0,0945  | 0,2142  |
| O | 25 | -0,4763        | -0,4402 | -0,9405 | -0,4763                     | -0,4402 | -0,9405 |
| O | 26 | -0,4692        | -0,4435 | -0,9512 | -0,4692                     | -0,4435 | -0,9512 |

**1' radical-cation ub3lyp/6-31g(d) Charges**

|   |    | <b>Charges</b> |            |            | <b>Charges (H-included)</b> |            |            |
|---|----|----------------|------------|------------|-----------------------------|------------|------------|
|   |    | <b>ChelpG</b>  | <b>MKS</b> | <b>NPA</b> | <b>ChelpG</b>               | <b>MKS</b> | <b>NPA</b> |
| C | 1  | 0,0233         | -0,0213    | -0,0253    | 0,1284                      | 0,1165     | 0,1036     |
| C | 2  | -0,1047        | -0,1309    | -0,1356    | 0,0162                      | 0,0165     | -0,0040    |
| C | 3  | -0,0739        | -0,0969    | -0,0355    | 0,0444                      | 0,0421     | 0,0867     |
| C | 4  | -0,0051        | 0,0040     | -0,0297    | -0,0051                     | 0,0040     | -0,0297    |
| C | 5  | 0,0839         | 0,0887     | 0,0106     | 0,0839                      | 0,0887     | 0,0106     |
| C | 6  | -0,1541        | -0,1737    | -0,0957    | -0,0174                     | -0,0144    | 0,0330     |
| C | 7  | 0,1225         | 0,1344     | 0,0987     | 0,1225                      | 0,1344     | 0,0987     |
| C | 8  | 0,0001         | 0,0220     | -0,0421    | 0,0001                      | 0,0220     | -0,0421    |
| C | 9  | 0,0040         | -0,0048    | -0,0040    | 0,0040                      | -0,0048    | -0,0040    |
| C | 10 | -0,0967        | -0,1179    | -0,0812    | 0,0247                      | 0,0251     | 0,0471     |
| C | 11 | -0,0004        | -0,0254    | -0,0443    | 0,1103                      | 0,1111     | 0,0852     |
| C | 12 | -0,1401        | -0,1507    | -0,1302    | -0,0090                     | 0,0008     | 0,0012     |
| C | 13 | 0,0089         | -0,0877    | -0,0382    | 0,0787                      | 0,0528     | 0,0871     |
| C | 14 | -0,1566        | -0,2111    | 0,0615     | -0,0331                     | -0,0604    | 0,1867     |
| C | 15 | 0,2086         | 0,2187     | -0,0307    | 0,2086                      | 0,2187     | -0,0307    |
| C | 16 | -0,0490        | -0,1031    | -0,0405    | 0,0144                      | 0,0189     | 0,0888     |
| C | 17 | -0,0786        | -0,1246    | -0,1305    | 0,0740                      | 0,0424     | 0,0109     |
| C | 18 | -0,0416        | -0,0147    | -0,0564    | -0,0416                     | -0,0147    | -0,0564    |
| C | 19 | -0,0424        | -0,1160    | -0,1262    | 0,0970                      | 0,0557     | 0,0148     |
| C | 20 | -0,1601        | -0,1504    | -0,0372    | -0,0195                     | 0,0064     | 0,0906     |
| S | 21 | 0,9262         | 0,8938     | 1,1823     | 0,9262                      | 0,8938     | 1,1823     |
| N | 22 | -0,2787        | -0,1338    | -0,3133    | -0,2787                     | -0,1338    | -0,3133    |
| C | 23 | -0,0966        | -0,3192    | -0,2403    | 0,1888                      | 0,1301     | 0,1337     |
| C | 24 | -0,0697        | -0,3140    | -0,2401    | 0,1866                      | 0,1286     | 0,1322     |
| O | 25 | -0,4513        | -0,4378    | -0,4558    | -0,4513                     | -0,4378    | -0,4558    |
| O | 26 | -0,4530        | -0,4428    | -0,4572    | -0,4530                     | -0,4428    | -0,4572    |

1' radical-cation ub3lyp/6-31g(d) Spin Density

|   |    | Spin Density |                             | Spin Density<br>(H included) |                             |
|---|----|--------------|-----------------------------|------------------------------|-----------------------------|
|   |    | Mulliken     | NPA<br>( $\beta - \alpha$ ) | Mulliken                     | NPA<br>( $\beta - \alpha$ ) |
| C | 1  | 0,1171       | 0,1038                      | 0,1118                       | 0,1007                      |
| C | 2  | -0,0519      | -0,0383                     | -0,0502                      | -0,0373                     |
| C | 3  | 0,0981       | 0,0859                      | 0,0940                       | 0,0832                      |
| C | 4  | -0,0155      | -0,0020                     | -0,0155                      | -0,0020                     |
| C | 5  | 0,0368       | 0,0340                      | 0,0368                       | 0,0340                      |
| C | 6  | -0,0017      | 0,0015                      | -0,0018                      | 0,0015                      |
| C | 7  | 0,1357       | 0,1248                      | 0,1357                       | 0,1248                      |
| C | 8  | -0,0173      | -0,0079                     | -0,0173                      | -0,0079                     |
| C | 9  | 0,0046       | 0,0091                      | 0,0046                       | 0,0091                      |
| C | 10 | 0,0264       | 0,0245                      | 0,0254                       | 0,0238                      |
| C | 11 | 0,0813       | 0,0731                      | 0,0775                       | 0,0709                      |
| C | 12 | -0,0372      | -0,0265                     | -0,0361                      | -0,0258                     |
| C | 13 | 0,0942       | 0,0826                      | 0,0901                       | 0,0800                      |
| C | 14 | 0,2218       | 0,2095                      | 0,2147                       | 0,2068                      |
| C | 15 | -0,0008      | 0,0115                      | -0,0008                      | 0,0115                      |
| C | 16 | 0,1031       | 0,0927                      | 0,0982                       | 0,0897                      |
| C | 17 | -0,0593      | -0,0432                     | -0,0572                      | -0,0419                     |
| C | 18 | 0,1595       | 0,1389                      | 0,1595                       | 0,1389                      |
| C | 19 | -0,0545      | -0,0399                     | -0,0526                      | -0,0388                     |
| C | 20 | 0,0931       | 0,0838                      | 0,0889                       | 0,0811                      |
| S | 21 | -0,0166      | -0,0096                     | -0,0166                      | -0,0096                     |
| N | 22 | 0,0833       | 0,0801                      | 0,0833                       | 0,0801                      |
| C | 23 | -0,0033      | -0,0014                     | 0,0052                       | 0,0058                      |
| C | 24 | -0,0034      | -0,0016                     | 0,0047                       | 0,0054                      |
| O | 25 | 0,0086       | 0,0079                      | 0,0086                       | 0,0079                      |
| O | 26 | 0,0089       | 0,0081                      | 0,0089                       | 0,0081                      |

**2' neutral rb3lyp/6-31g(d) Charges**

|   |    | <b>Charges</b> |         |         | <b>Charges (H-included)</b> |         |         |
|---|----|----------------|---------|---------|-----------------------------|---------|---------|
|   |    | ChelpG         | MKS     | NPA     | ChelpG                      | MKS     | NPA     |
| C | 1  | 0.0993         | 0.0423  | -0.2418 | 0.0993                      | 0.0423  | -0.2418 |
| C | 2  | -0.1455        | -0.0448 | -0.0788 | -0.1455                     | -0.0448 | -0.0788 |
| C | 3  | -0.0381        | -0.1455 | -0.2563 | 0.0607                      | 0.0038  | -0.0074 |
| C | 4  | -0.2657        | -0.3025 | -0.4350 | -0.0727                     | -0.0750 | -0.1767 |
| S | 5  | 0.0045         | 0.0367  | 0.4855  | 0.0045                      | 0.0367  | 0.4855  |
| C | 6  | 0.0200         | 0.0239  | -0.2342 | 0.0200                      | 0.0239  | -0.2342 |
| C | 7  | -0.0662        | -0.0814 | -0.0967 | -0.0662                     | -0.0814 | -0.0967 |
| C | 8  | 0.1558         | 0.1244  | -0.0147 | 0.1558                      | 0.1244  | -0.0147 |
| S | 9  | 0.0189         | 0.0477  | 0.4893  | 0.0189                      | 0.0477  | 0.4893  |
| C | 10 | -0.2626        | -0.3167 | -0.4366 | -0.0657                     | -0.0910 | -0.1769 |
| C | 11 | -0.0603        | -0.0934 | -0.2558 | 0.0390                      | 0.0549  | 0.0006  |
| C | 12 | -0.2603        | -0.2589 | -0.1625 | -0.1281                     | -0.1121 | 0.0750  |
| C | 13 | 0.2538         | 0.1760  | -0.0555 | 0.2538                      | 0.1760  | -0.0555 |
| C | 14 | -0.1084        | -0.1224 | -0.2176 | -0.0303                     | -0.0012 | 0.0357  |
| C | 15 | -0.0847        | -0.1108 | -0.1993 | 0.0297                      | 0.0179  | 0.0637  |
| C | 16 | -0.0674        | -0.0826 | -0.3310 | -0.0674                     | -0.0826 | -0.3310 |
| C | 17 | 0.0432         | -0.0320 | -0.2123 | 0.1354                      | 0.0931  | 0.0587  |
| C | 18 | -0.2689        | -0.1949 | -0.2044 | -0.1364                     | -0.0606 | 0.0400  |
| S | 19 | 0.8700         | 0.8477  | 2.3433  | 0.8700                      | 0.8477  | 2.3433  |
| N | 20 | -0.3445        | -0.2376 | -0.7271 | -0.3445                     | -0.2376 | -0.7271 |
| C | 21 | -0.0560        | -0.2633 | -0.4849 | 0.1378                      | 0.1051  | 0.2146  |
| C | 22 | -0.0195        | -0.2769 | -0.4841 | 0.1801                      | 0.1239  | 0.2248  |
| O | 23 | -0.4719        | -0.4575 | -0.9504 | -0.4719                     | -0.4575 | -0.9504 |
| O | 24 | -0.4764        | -0.4537 | -0.9402 | -0.4764                     | -0.4537 | -0.9402 |

**2' radical-cation ub3lyp/6-31g(d) Charges**

|   |    | <b>Charges</b> |         |         | <b>Charges (H-included)</b> |         |         |
|---|----|----------------|---------|---------|-----------------------------|---------|---------|
|   |    | ChelpG         | MKS     | NPA     | ChelpG                      | MKS     | NPA     |
| C | 1  | 0.0816         | 0.0476  | -0.2035 | 0.0816                      | 0.0476  | -0.2035 |
| C | 2  | 0.0204         | 0.0943  | 0.0411  | 0.0204                      | 0.0943  | 0.0411  |
| C | 3  | -0.0760        | -0.1665 | -0.2607 | 0.0651                      | 0.0214  | 0.0195  |
| C | 4  | -0.1325        | -0.1676 | -0.3053 | 0.0869                      | 0.0823  | -0.0181 |
| S | 5  | 0.1257         | 0.1539  | 0.5593  | 0.1257                      | 0.1539  | 0.5593  |
| C | 6  | 0.0110         | -0.0118 | -0.2020 | 0.0110                      | -0.0118 | -0.2020 |
| C | 7  | 0.0833         | 0.0858  | 0.0279  | 0.0833                      | 0.0858  | 0.0279  |
| C | 8  | 0.0118         | -0.0134 | -0.1023 | 0.0118                      | -0.0134 | -0.1023 |
| S | 9  | 0.1342         | 0.1718  | 0.5641  | 0.1342                      | 0.1718  | 0.5641  |
| C | 10 | -0.1414        | -0.1890 | -0.3074 | 0.0841                      | 0.0617  | -0.0196 |
| C | 11 | -0.0581        | -0.1057 | -0.2557 | 0.0590                      | 0.0670  | 0.0302  |
| C | 12 | -0.1213        | -0.1347 | -0.0620 | 0.0216                      | 0.0226  | 0.1899  |
| C | 13 | 0.0994         | 0.0733  | -0.0988 | 0.0994                      | 0.0733  | -0.0988 |
| C | 14 | 0.0001         | -0.0342 | -0.2114 | 0.0577                      | 0.0720  | 0.0369  |
| C | 15 | -0.1443        | -0.1782 | -0.1976 | -0.0036                     | -0.0228 | 0.0764  |
| C | 16 | -0.0117        | -0.0265 | -0.2823 | -0.0117                     | -0.0265 | -0.2823 |
| C | 17 | 0.0004         | -0.0514 | -0.2112 | 0.1175                      | 0.0926  | 0.0736  |
| C | 18 | -0.1537        | -0.1368 | -0.1748 | -0.0305                     | 0.0054  | 0.0786  |
| S | 19 | 0.8901         | 0.8730  | 2.3513  | 0.8901                      | 0.8730  | 2.3513  |
| N | 20 | -0.3478        | -0.1752 | -0.7320 | -0.3478                     | -0.1752 | -0.7320 |
| C | 21 | -0.0759        | -0.3867 | -0.4846 | 0.1606                      | 0.0950  | 0.2296  |
| C | 22 | -0.0252        | -0.3793 | -0.4836 | 0.2056                      | 0.1223  | 0.2443  |
| O | 23 | -0.4579        | -0.4454 | -0.9338 | -0.4579                     | -0.4454 | -0.9338 |
| O | 24 | -0.4640        | -0.4470 | -0.9301 | -0.4640                     | -0.4470 | -0.9301 |

2' radical-cation ub3lyp/6-31g(d) Spin Density

|   |    | Spin Density |                             | Spin Density<br>(H included) |                             |
|---|----|--------------|-----------------------------|------------------------------|-----------------------------|
|   |    | Mulliken     | NPA<br>( $\beta - \alpha$ ) | Mulliken                     | NPA<br>( $\beta - \alpha$ ) |
| C | 1  | 0.1142       | 0.1177                      | 0.1142                       | 0.1177                      |
| C | 2  | 0.2294       | 0.2056                      | 0.2294                       | 0.2056                      |
| C | 3  | -0.0980      | -0.0741                     | -0.0949                      | -0.0723                     |
| C | 4  | 0.3342       | 0.3089                      | 0.3182                       | 0.2995                      |
| S | 5  | -0.0416      | -0.0379                     | -0.0416                      | -0.0379                     |
| C | 6  | 0.0985       | 0.1053                      | 0.0985                       | 0.1053                      |
| C | 7  | 0.2332       | 0.2079                      | 0.2332                       | 0.2079                      |
| C | 8  | -0.0517      | -0.0257                     | -0.0517                      | -0.0257                     |
| S | 9  | -0.0389      | -0.0351                     | -0.0389                      | -0.0351                     |
| C | 10 | 0.3426       | 0.3169                      | 0.3262                       | 0.3073                      |
| C | 11 | -0.0925      | -0.0701                     | -0.0896                      | -0.0684                     |
| C | 12 | 0.0037       | 0.0025                      | 0.0032                       | 0.0020                      |
| C | 13 | -0.0019      | -0.0017                     | -0.0019                      | -0.0017                     |
| C | 14 | -0.0010      | -0.0011                     | -0.0012                      | -0.0011                     |
| C | 15 | 0.0008       | 0.0006                      | 0.0008                       | 0.0006                      |
| C | 16 | -0.0028      | -0.0024                     | -0.0028                      | -0.0024                     |
| C | 17 | 0.0010       | 0.0007                      | 0.0009                       | 0.0007                      |
| C | 18 | -0.0016      | -0.0015                     | -0.0015                      | -0.0014                     |
| S | 19 | 0.0002       | 0.0001                      | 0.0002                       | 0.0001                      |
| N | 20 | -0.0003      | -0.0003                     | -0.0003                      | -0.0003                     |
| C | 21 | 0.0000       | 0.0000                      | 0.0000                       | 0.0000                      |
| C | 22 | 0.0000       | 0.0000                      | 0.0000                       | 0.0000                      |
| O | 23 | -0.0001      | -0.0001                     | -0.0001                      | -0.0001                     |
| O | 24 | -0.0003      | -0.0003                     | -0.0003                      | -0.0003                     |



### 3 neutral rb3lyp/6-31g(d) Charges

|   |    | Charges |         |         | Charges (H-included) |         |         |
|---|----|---------|---------|---------|----------------------|---------|---------|
|   |    | ChelpG  | MKS     | NPA     | ChelpG               | MKS     | NPA     |
| C | 1  | -0.0783 | -0.1106 | -0.2009 | 0.0207               | 0.0156  | 0.0428  |
| C | 2  | -0.0716 | -0.0960 | -0.2330 | 0.0270               | 0.0297  | 0.0136  |
| C | 3  | -0.1398 | -0.2128 | -0.1802 | -0.0068              | -0.0499 | 0.0787  |
| C | 4  | 0.0492  | 0.2231  | -0.0693 | 0.0492               | 0.2231  | -0.0693 |
| C | 5  | 0.0198  | -0.0084 | -0.0183 | 0.0198               | -0.0084 | -0.0183 |
| C | 6  | -0.1158 | -0.1425 | -0.2140 | -0.0093              | -0.0120 | 0.0277  |
| C | 7  | 0.0762  | -0.1643 | 0.1026  | 0.0762               | -0.1643 | 0.1026  |
| C | 8  | 0.0492  | 0.2123  | -0.0693 | 0.0492               | 0.2123  | -0.0693 |
| C | 9  | 0.0199  | -0.0079 | -0.0182 | 0.0199               | -0.0079 | -0.0182 |
| C | 10 | -0.1157 | -0.1433 | -0.2140 | -0.0092              | -0.0118 | 0.0277  |
| C | 11 | -0.0787 | -0.1031 | -0.2009 | 0.0204               | 0.0215  | 0.0428  |
| C | 12 | -0.0710 | -0.1061 | -0.2330 | 0.0275               | 0.0205  | 0.0136  |
| C | 13 | -0.1401 | -0.2038 | -0.1802 | -0.0072              | -0.0377 | 0.0788  |
| C | 14 | -0.2387 | -0.2336 | -0.2416 | -0.2387              | -0.2336 | -0.2416 |
| C | 15 | 0.4276  | 0.4393  | 0.2794  | 0.4276               | 0.4393  | 0.2794  |
| N | 16 | -0.4470 | -0.4391 | -0.2852 | -0.4470              | -0.4391 | -0.2852 |
| C | 17 | 0.4277  | 0.4410  | 0.2794  | 0.4277               | 0.4410  | 0.2794  |
| N | 18 | -0.4471 | -0.4382 | -0.2852 | -0.4471              | -0.4382 | -0.2852 |

### 3 radical-cation ub3lyp/6-31g(d) Charges

|   |   | Charges |         |         | Charges (H-included) |         |        |
|---|---|---------|---------|---------|----------------------|---------|--------|
|   |   | ChelpG  | MKS     | NPA     | ChelpG               | MKS     | NPA    |
| C | 1 | -0.0858 | -0.1168 | -0.1086 | 0.0540               | 0.0516  | 0.0307 |
| C | 2 | 0.1077  | 0.0790  | 0.0846  | 0.2259               | 0.2221  | 0.2185 |
| C | 3 | -0.1815 | -0.2173 | -0.1268 | -0.0253              | -0.0411 | 0.0165 |

|   |    |         |         |         |         |         |         |
|---|----|---------|---------|---------|---------|---------|---------|
| C | 4  | 0.1605  | 0.2768  | 0.0731  | 0.1605  | 0.2768  | 0.0731  |
| C | 5  | 0.0461  | 0.0473  | 0.0719  | 0.0461  | 0.0473  | 0.0719  |
| C | 6  | -0.0598 | -0.1019 | -0.0362 | 0.0779  | 0.0621  | 0.0966  |
| C | 7  | -0.0447 | -0.2359 | 0.0104  | -0.0447 | -0.2359 | 0.0104  |
| C | 8  | 0.1685  | 0.2845  | 0.0732  | 0.1685  | 0.2845  | 0.0732  |
| C | 9  | 0.0455  | 0.0336  | 0.0719  | 0.0455  | 0.0336  | 0.0719  |
| C | 10 | -0.0590 | -0.0951 | -0.0363 | 0.0792  | 0.0686  | 0.0965  |
| C | 11 | -0.0946 | -0.1157 | -0.1085 | 0.0476  | 0.0522  | 0.0308  |
| C | 12 | 0.1214  | 0.0752  | 0.0846  | 0.2369  | 0.2195  | 0.2185  |
| C | 13 | -0.1986 | -0.2221 | -0.1268 | -0.0379 | -0.0417 | 0.0165  |
| C | 14 | -0.1082 | -0.1268 | -0.0766 | -0.1082 | -0.1268 | -0.0766 |
| C | 15 | 0.3956  | 0.4123  | 0.1263  | 0.3956  | 0.4123  | 0.1263  |
| N | 16 | -0.3571 | -0.3496 | -0.1005 | -0.3571 | -0.3496 | -0.1005 |
| C | 17 | 0.3906  | 0.4137  | 0.1263  | 0.3906  | 0.4137  | 0.1263  |
| N | 18 | -0.3551 | -0.3492 | -0.1004 | -0.3551 | -0.3492 | -0.1004 |

**3 radical-cation ub3lyp/6-31g(d) Spin Density**

|   |    | Spin Density |                | Spin Density<br>(H included) |                |
|---|----|--------------|----------------|------------------------------|----------------|
|   |    | Mulliken     | NPA<br>(b - a) | Mulliken                     | NPA<br>(b - a) |
| C | 1  | -0.0421      | -0.0237        | -0.0413                      | -0.0232        |
| C | 2  | 0.2931       | 0.2600         | 0.2803                       | 0.2524         |
| C | 3  | -0.0838      | -0.0611        | -0.0813                      | -0.0596        |
| C | 4  | 0.1557       | 0.1353         | 0.1557                       | 0.1353         |
| C | 5  | 0.1158       | 0.1144         | 0.1158                       | 0.1144         |
| C | 6  | 0.0909       | 0.0882         | 0.0862                       | 0.0852         |
| C | 7  | -0.0405      | -0.0174        | -0.0405                      | -0.0174        |
| C | 8  | 0.1559       | 0.1354         | 0.1559                       | 0.1354         |
| C | 9  | 0.1157       | 0.1144         | 0.1157                       | 0.1144         |
| C | 10 | 0.0908       | 0.0881         | 0.0861                       | 0.0852         |
| C | 11 | -0.0420      | -0.0237        | -0.0413                      | -0.0232        |
| C | 12 | 0.2930       | 0.2599         | 0.2803                       | 0.2523         |
| C | 13 | -0.0838      | -0.0611        | -0.0813                      | -0.0596        |
| C | 14 | 0.0084       | 0.0070         | 0.0084                       | 0.0070         |
| C | 15 | -0.0021      | -0.0017        | -0.0021                      | -0.0017        |
| N | 16 | 0.0026       | 0.0025         | 0.0026                       | 0.0025         |
| C | 17 | -0.0021      | -0.0017        | -0.0021                      | -0.0017        |
| N | 18 | 0.0026       | 0.0025         | 0.0026                       | 0.0025         |
